# Supplementary material for: RAFT polymerization of bromotyramine-based 4-acryloyl-1,2,3-triazole: a functional monomer and polymer family through click chemistry
Source: Royal Society of Chemistry journal article supplement (doi:10.1039/c5ra27578d), 2016-01-01
Supplement: c5ra27578d1.pdf [file c5ra27578d1.pdf]

## Supplementary information

### RAFT polymerization of Bromotyramine-based 4 -acryloyl-1,2,3- triazole: A Functional Monomers and Polymers Family through Click Chemistry.

Sofyane Andjouh,<sup>a</sup> Christine Bressy,<sup>\*,a</sup> and Yves Blache<sup>a</sup>

<sup>a</sup> Laboratoire Matériaux Polymères-Interfaces-Environnement Marin (MAPIEM), Université de Toulon, EA 4323, 83957 La Garde, France.

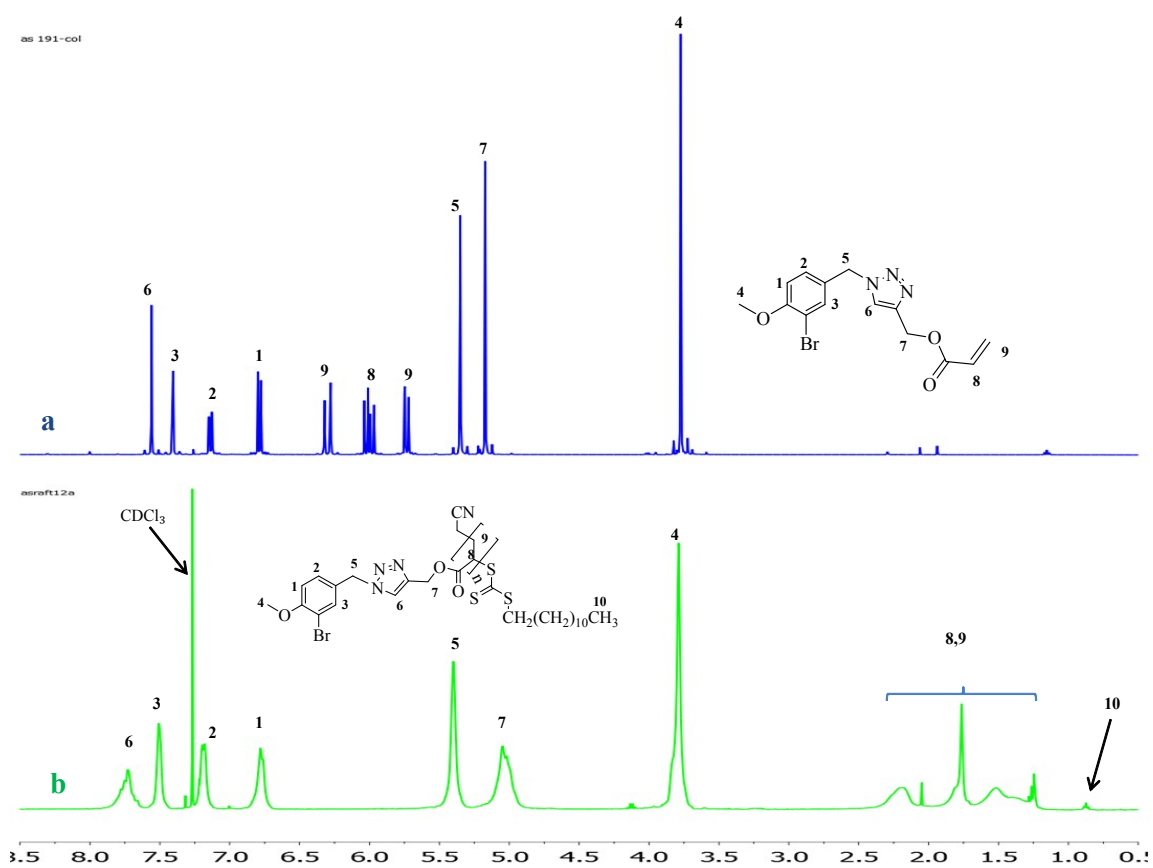

**Figure 1.** <sup>1</sup>H-NMR spectra of (a) 4-ATri 4a in CDCl<sub>3</sub>, (b) its purified homopolymer (4-ATri 4a) in CDCl<sub>3</sub>

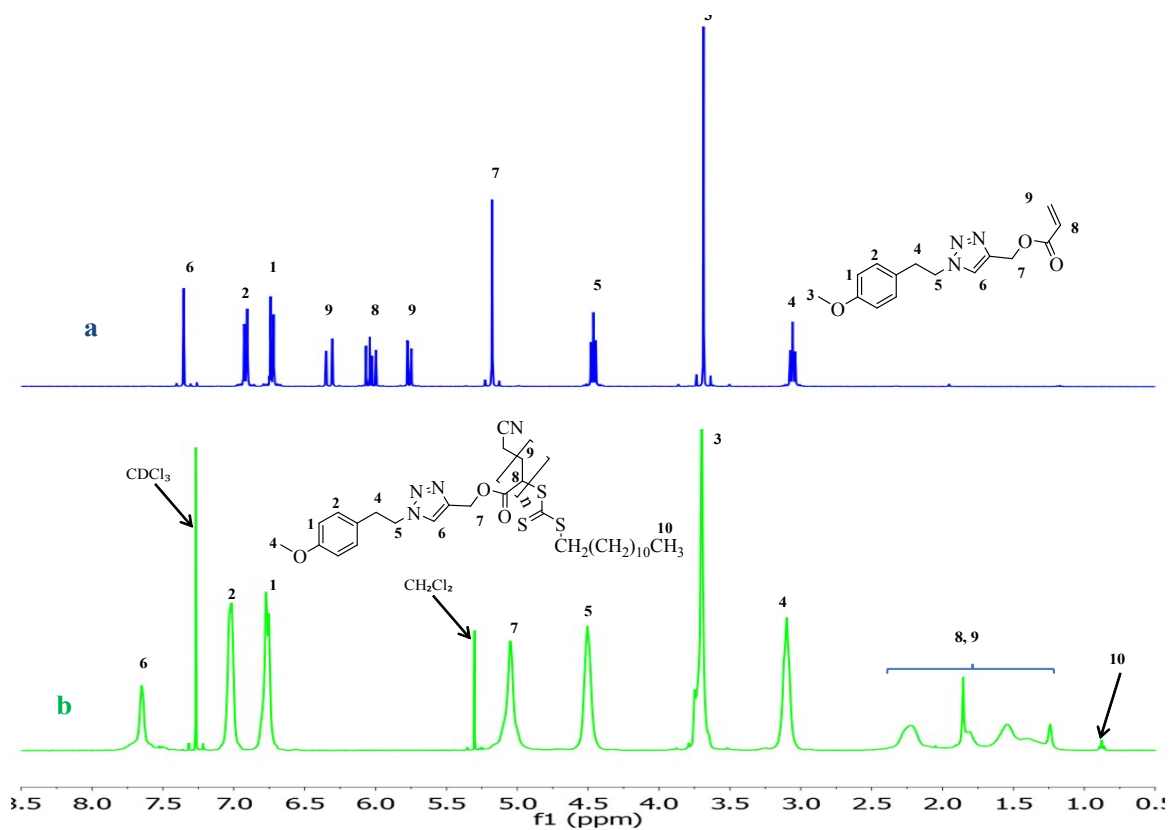

**Figure 2.** <sup>1</sup>H-NMR spectra of (a) 4-ATri 4c in CDCl<sub>3</sub>, (b) its purified homopolymer (4-ATri 4c) in CDCl<sub>3</sub>

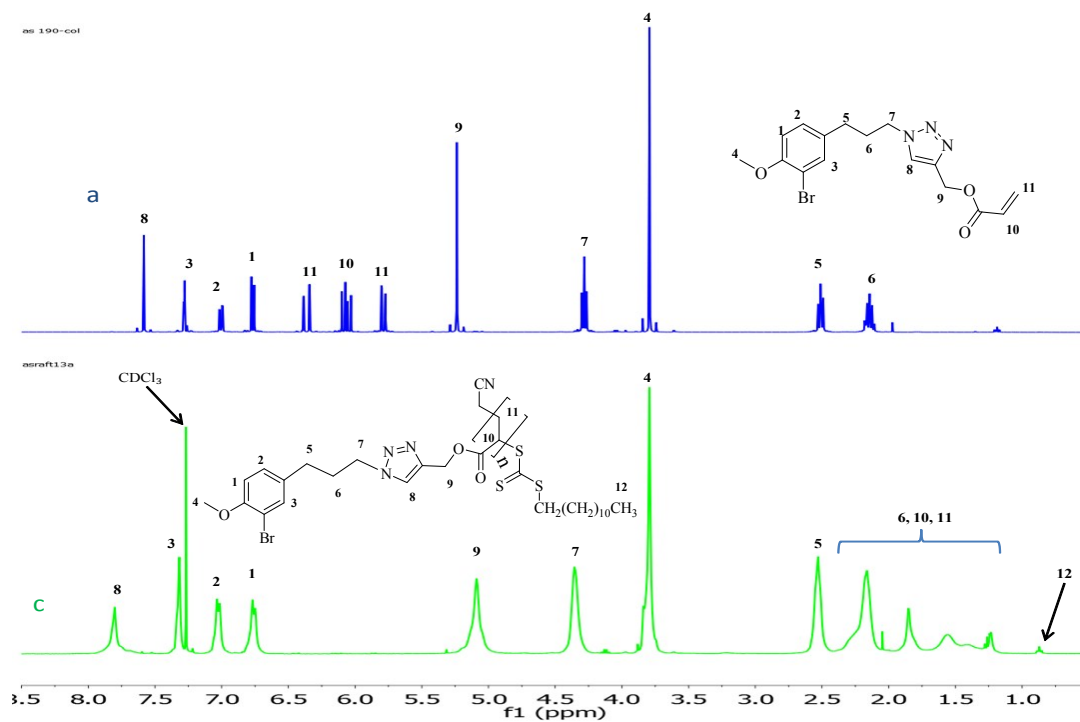

**Figure 3.** <sup>1</sup>H-NMR spectra of (a) 4-ATri 4d in CDCl<sub>3</sub>, (b) its purified homopolymer (4-ATri 4d) in CDCl<sub>3</sub>

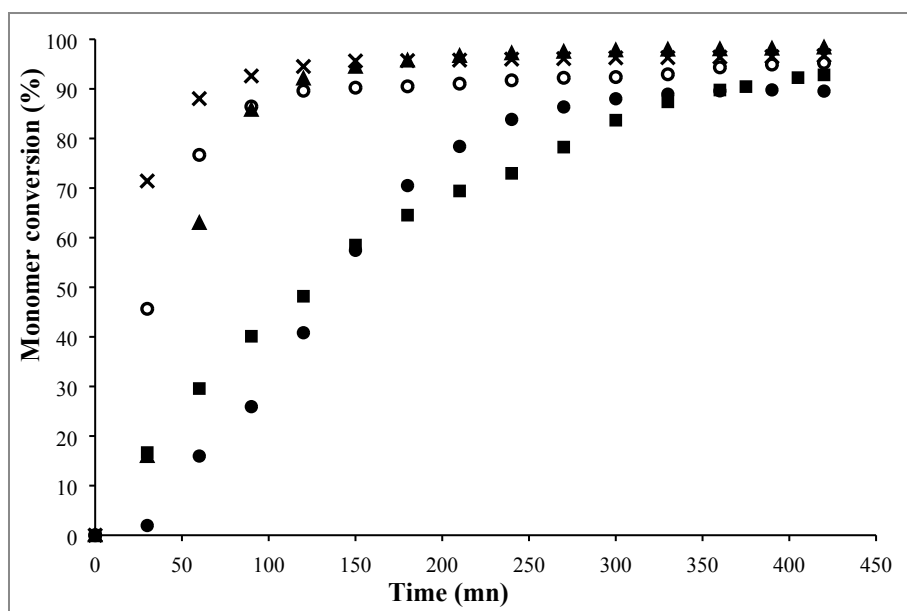

**Figure 4.** Monomer conversion vs time. Homopolymerizations of triazole acrylate 4-A Tri 4b using CMDT as CTA. CMDT/AIBN molar ratio of 10/1. DMSO-d<sub>6</sub> at 70°C (▲), DMSO-d<sub>6</sub> at 60°C (■), DMF-d<sub>7</sub> at 70°C (○), DMF-d<sub>7</sub> at 60°C (●) and DMSO-d<sub>6</sub> with absence of CMDT at 70°C (×).

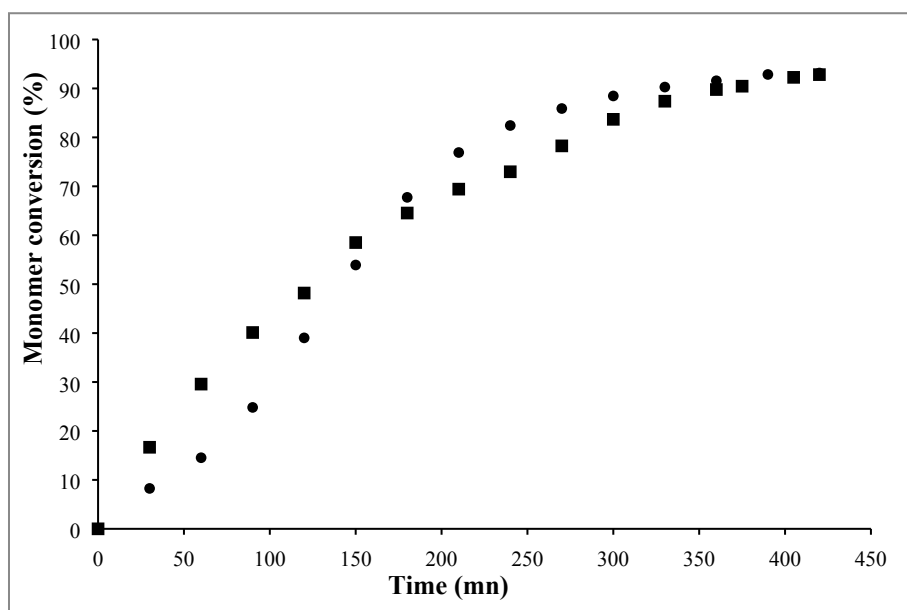

**Figure 5.** Monomer conversion vs time. Homopolymerizations of triazole acrylate 4-A Tri 4b at 60°C. CTA/AIBN molar ratio of 10/1 in DMSO-d<sub>6</sub> using CMDT(■) and DDMAT (●) as CTA.

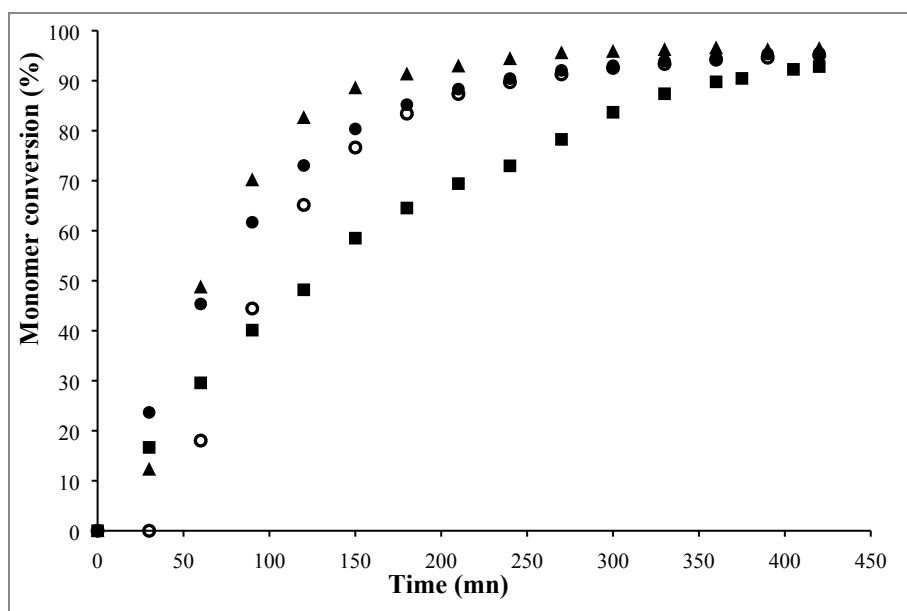

**Figure 6.** Monomer conversion vs time. Homopolymerizations of triazole acrylates. CDMT/AIBN molar ratio of 10/1 at 60°C in DMSO-d<sub>6</sub>. 4-ATri 4a (▲), 4-ATri 4b (■), 4-ATri 4c (○) and 4-ATri 4d (●).

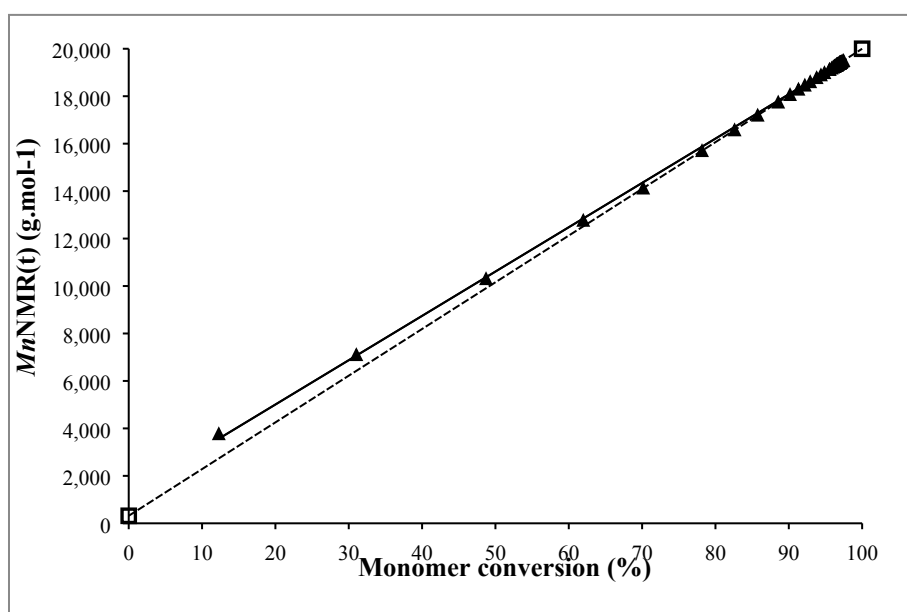

**Figure 7.** Evolution of  $M_n^{NMR}(t)$  vs monomer conversion during the RAFT polymerization of 4-ATri 4a (▲) at 60°C in DMSO-d<sub>6</sub>.

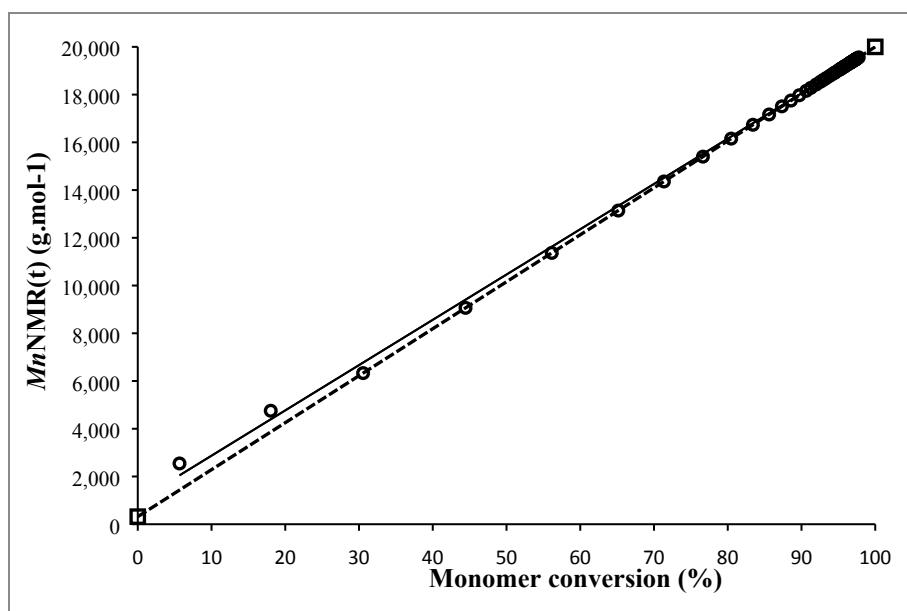

**Figure 8.** Evolution of  $M_n^{\text{NMR}}(t)$  vs monomer conversion during the RAFT polymerization of 4-ATri 4c (o) at 60°C in DMSO-d<sub>6</sub>.

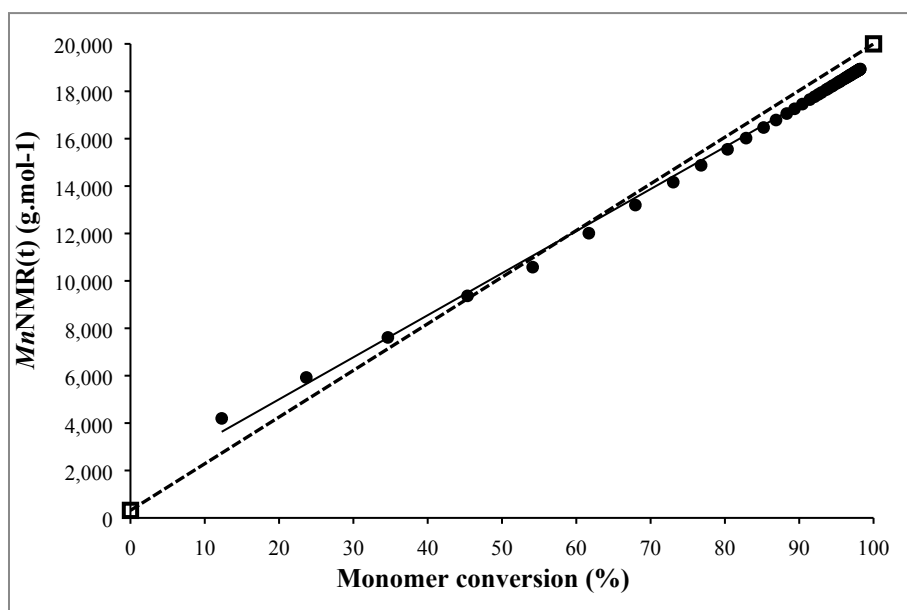

**Figure 9.** Evolution of  $M_n^{\text{NMR}}(t)$  vs monomer conversion during the RAFT polymerization of 4-ATri 4d (•) at 60°C in DMSO-d<sub>6</sub>.

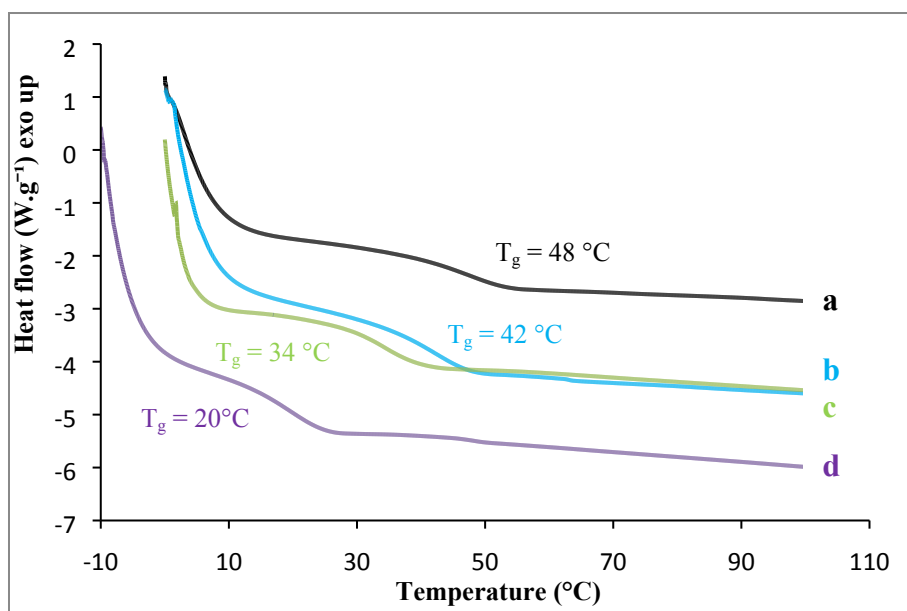

**Figure 10.** DCS thermograms of (a) p(4-ATri 4a), (b) p(4-ATri 4b), (c) p(4-ATri 4c) and (d) p(4-ATri 4d).

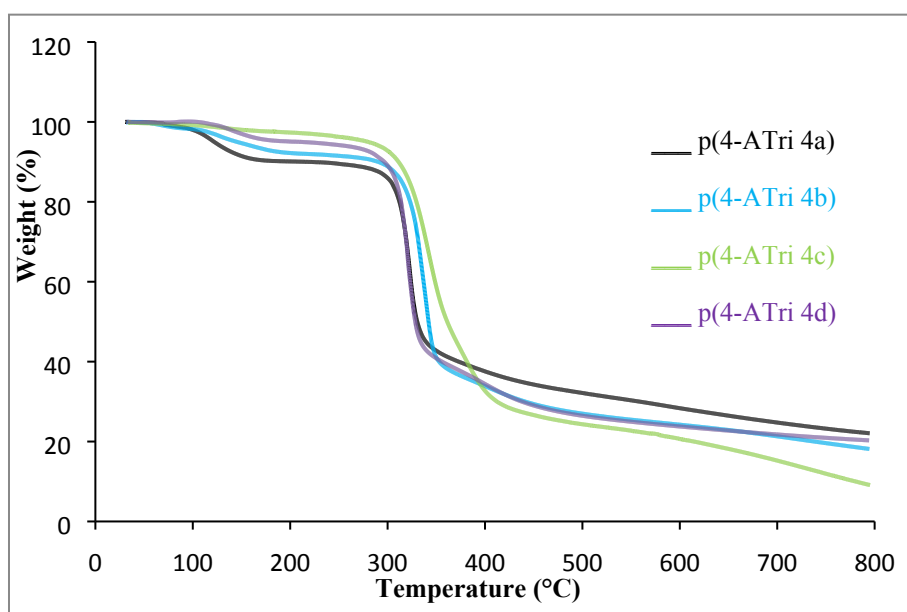

**Figure 11.** TGA traces of (a) p(4-ATri 4a), (b) p(4-ATri 4b), (c) p(4-ATri 4c) and (d) p(4-ATri 4d) under nitrogen at a heating rate of 10 °C/min.

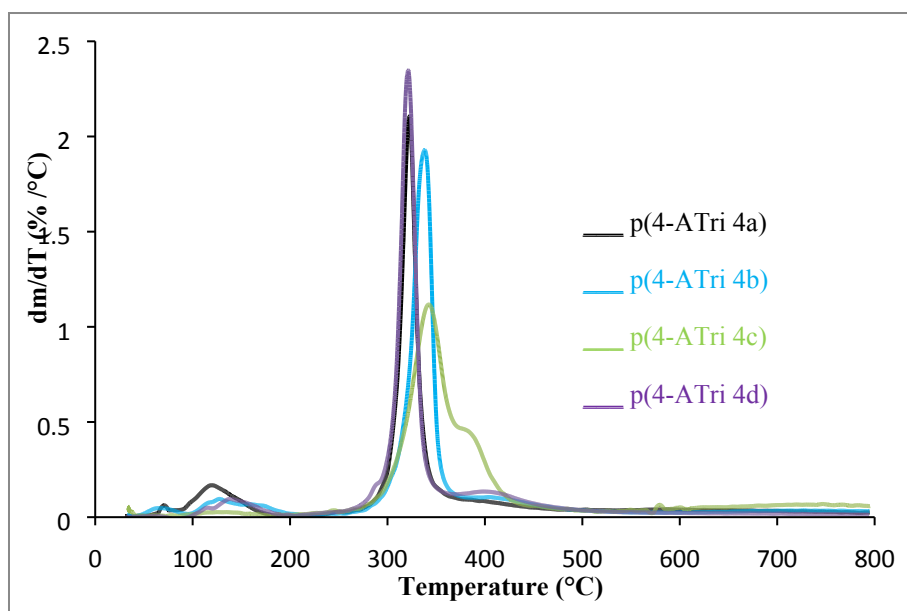

**Figure 12.** TGA weight loss derivative as a function of temperature for (a) p(4-ATri 4a), (b) p(4-ATri 4b), (c) p(4-ATri 4c) and (d) p(4-ATri 4d) under nitrogen at a heating rate of 10 °C/min.
